# Supplementary material
Source: PubMed Central journal article supplement (PMC4422235)
Supplement: CJN.06200614_CJN06200614SupplementaryData.pdf [file CJN.06200614_CJN06200614SupplementaryData.pdf]

Marjolein Bonthuis<sup>1</sup>, Marco Busutti<sup>2</sup>, Karlijn J. van Stralen<sup>1</sup>, Kitty J. Jager<sup>1</sup>, Sergey Baiko<sup>3</sup>, Sevcen Bakkaloglu<sup>4</sup>, Nina Battelino<sup>5</sup>, Maria Gaydarova<sup>6</sup>, Bruno Gianoglio<sup>7</sup>, Paloma Parvex<sup>8</sup>, Clara Gomes<sup>9</sup>, James G. Heaf<sup>10</sup>, Ludmila Podracka<sup>11</sup>, Dafina Kuzmanovska<sup>12</sup>, Maria S. Molchanova<sup>13</sup>, Tatiana E. Pankratenko<sup>14</sup>, Fotios Papachristou<sup>15</sup>, György Reusz<sup>16</sup>, Maria José Sanahuja<sup>17</sup>, Rukshana Shroff<sup>18</sup>, Jaap W. Groothoff<sup>19</sup>, Franz Schaefer<sup>20</sup>, Enrico Verrina<sup>21</sup>

<sup>1</sup>ESPN/ERA-EDTA Registry, Department of Medical Informatics, Academic Medical Center, University of Amsterdam, Amsterdam, the Netherlands;

<sup>2</sup>Department of Pediatrics, Nephrology Unit, S.Orsola-Malpighi Hospital, University of Bologna, Bologna, Italy;

<sup>3</sup>Department of Pediatrics, Belorussian State Medical University, Minsk, Belarus;

<sup>4</sup>Department of Pediatrics, Division of Pediatric Nephrology, Gazi University School of Medicine, Ankara, Turkey;

<sup>5</sup>Department of Pediatric Nephrology, University Medical Centre Ljubljana, Ljubljana, Slovenia;

<sup>6</sup>Nephrology and Dialysis, University Paediatric Hospital, Sofia, Bulgaria;

<sup>7</sup>Nephrology, Dialysis and Transplantation Unit, Regina Margherita Children's Hospital, Torino, Italy;

<sup>8</sup>Pediatric Nephrology Unit, Department of Pediatrics, University Hospital, Geneva, Switzerland;

<sup>9</sup>Hospital Pediátrico Carmona da Mota, Coimbra, Portugal;

<sup>10</sup>Department of Nephrology B, Copenhagen University Hospital at Herlev, Herlev, Denmark;

<sup>11</sup>1st Paediatric Department, Faculty of Medicine, PJ Safarik University, Kosice, Slovak Republic;

<sup>12</sup>Skopje Pediatric Clinic, Nephrology Unit, Skopje, Macedonia;

<sup>13</sup>Pirogov Russian National Research Medical University, Moscow, Russia;

<sup>14</sup>Moscow Regional Research and Clinical Institute named after M.F. Vladimirskiy, Moscow, Russia;

<sup>15</sup>1<sup>st</sup> Department of Pediatric, Aristotle University, Hippokration Hospital, Thessaloniki, Greece;

<sup>16</sup>First Department of Pediatrics, Semmelweis University, Budapest, Hungary;

<sup>17</sup>Department of Pediatric Nephrology, La Fe Hospital, Valencia, Spain;

<sup>18</sup>Renal Unit, Great Ormond Street Hospital for Children NHS Foundation Trust, London, United Kingdom;

<sup>19</sup>Department of Pediatric Nephrology, Emma Children's Hospital, Academic Medical Center, Amsterdam, the Netherlands;

<sup>20</sup>Department of Pediatric Nephrology, University Children's Hospital, Heidelberg, Germany;

<sup>21</sup>Nephrology, Dialysis and Transplantation Unit, IRCCS Giannina Gaslini, Genoa, Italy;
